# Supplementary material
Source: MDPI journal article supplement (https://www.mdpi.com/2073-4395/12/10/2300)
Supplement: s1 [file s1]

## Supplementary section

**Table S1.** The comparison of the NMR data of compound **1** to those of the reported compound [31]

| No                | Compound <b>1</b> (DMSO- <i>d</i> <sub>6</sub> ) |                           | Thymine (DMSO- <i>d</i> <sub>6</sub> ) [31] |                           |
|-------------------|--------------------------------------------------|---------------------------|---------------------------------------------|---------------------------|
|                   | $\delta_{\text{H}}$ (ppm), <i>J</i> (Hz)         | $\delta_{\text{C}}$ (ppm) | $\delta_{\text{H}}$ (ppm), <i>J</i> (Hz)    | $\delta_{\text{C}}$ (ppm) |
| 2                 |                                                  | 151.9                     |                                             | 153.9                     |
| 4                 |                                                  | 165.4                     |                                             | 168.3                     |
| 5                 |                                                  | 108.0                     |                                             | 110.9                     |
| 6                 | 7.21 (1H, <i>s</i> )                             | 138.3                     | 7.28                                        | 139.8                     |
| 5-CH <sub>3</sub> | 1.69 (3H, <i>s</i> )                             | 12.0                      | 1.75                                        | 12.1                      |

The compound (**1**) was obtained as a white amorphous powder. <sup>1</sup>H-NMR (DMSO-*d*<sub>6</sub>, 500 MHz)  $\delta_{\text{H}}$ : 7.21 (1H, *s*), 1.69 (3H, *s*). <sup>13</sup>C-NMR (DMSO-*d*<sub>6</sub>, 125 MHz)  $\delta_{\text{C}}$ : 165.4, 151.9, 138.3, 108.0, 12.0. HR-ESI-MS spectrum: [M-H]<sup>-</sup> at *m/z* 125.0354. The NMR and mass spectra are presented in the supplementary section (Figure S1 – Figure S3).

**Table S2.** The comparison of the NMR data of compound **2** to those of the reported compound [32]

| No | VK05 (DMSO- <i>d</i> <sub>6</sub> )                |                                     |                              | Hexahydropyrrolo [1,2- <i>a</i> ]pyrazine-1,4-dione (D <sub>2</sub> O) [32] |
|----|----------------------------------------------------|-------------------------------------|------------------------------|-----------------------------------------------------------------------------|
|    | $\delta_{\text{H}}$ (ppm), <i>J</i> (Hz) (500 MHz) | $\delta_{\text{C}}$ (ppm) (125 MHz) | HMBC ( <i>H</i> → <i>C</i> ) | $\delta_{\text{H}}$ (ppm), <i>J</i> (Hz) (400 MHz)                          |
| 1  | -                                                  | 169.7                               |                              |                                                                             |
| 2  | 3.52 (1H, <i>dd</i> , 16.5, 4.6)                   | 46.1                                | C1, C4                       | 3.77 (1H, <i>d</i> , 17.3)                                                  |
|    | 3.98 (1H, <i>dd</i> , 16.6, 1.8)                   |                                     |                              | 4.04 (1H, <i>d</i> , 2.7)                                                   |
| 3  | 8.04 (1H, <i>s</i> )                               | -                                   | C2, C5                       |                                                                             |
| 4  | -                                                  | 164.3                               |                              |                                                                             |
| 5  | 4.11 (1H, <i>t</i> , 7.41)                         | 58.3                                | C1, C4, C6, C8               | 4.22 (1H, <i>s</i> )                                                        |
| 6  | 1.82 (1H, <i>m</i> )                               | 28.1                                | C5, C7, C8                   | 1.96 (1H, <i>s</i> )                                                        |
|    | 2.13 (1H, <i>m</i> )                               |                                     |                              | 2.23 (1H, <i>s</i> )                                                        |
| 7  | 1.82 (2H, <i>m</i> )                               | 22.2                                | C5, C6, C8                   | 1.84 (2H, <i>d</i> , 5.6)                                                   |
| 8  | 3.36 (2H, <i>m</i> )                               | 44.9                                | C1, C5, C6, C7               | 3.44 (2H, <i>dd</i> , 8.7, 4.8)                                             |

The compound (**2**) was obtained as a white amorphous powder. <sup>1</sup>H-NMR (DMSO-*d*<sub>6</sub>, 500 MHz)  $\delta_{\text{H}}$ : 8.04 (1H, *s*), 4.11 (1H, *t*, 7.41), 3.98 (1H, *dd*, 16.6, 1.8), 3.52 (1H, *dd*, 16.5, 4.6), 3.36 (2H, *m*), 2.13 (1H, *m*), 1.82 (1H, *m*), 1.82 (2H, *m*). <sup>13</sup>C-NMR (DMSO-*d*<sub>6</sub>, 125 MHz)  $\delta_{\text{C}}$ : 169.7, 164.3, 58.3, 46.1, 44.9, 28.1, 22.2. HR-ESI-MS spectrum: [M+H]<sup>+</sup> at *m/z* 155.0815. The NMR and mass spectra data are presented in the supplementary section (Figure S4 – Figure S8).

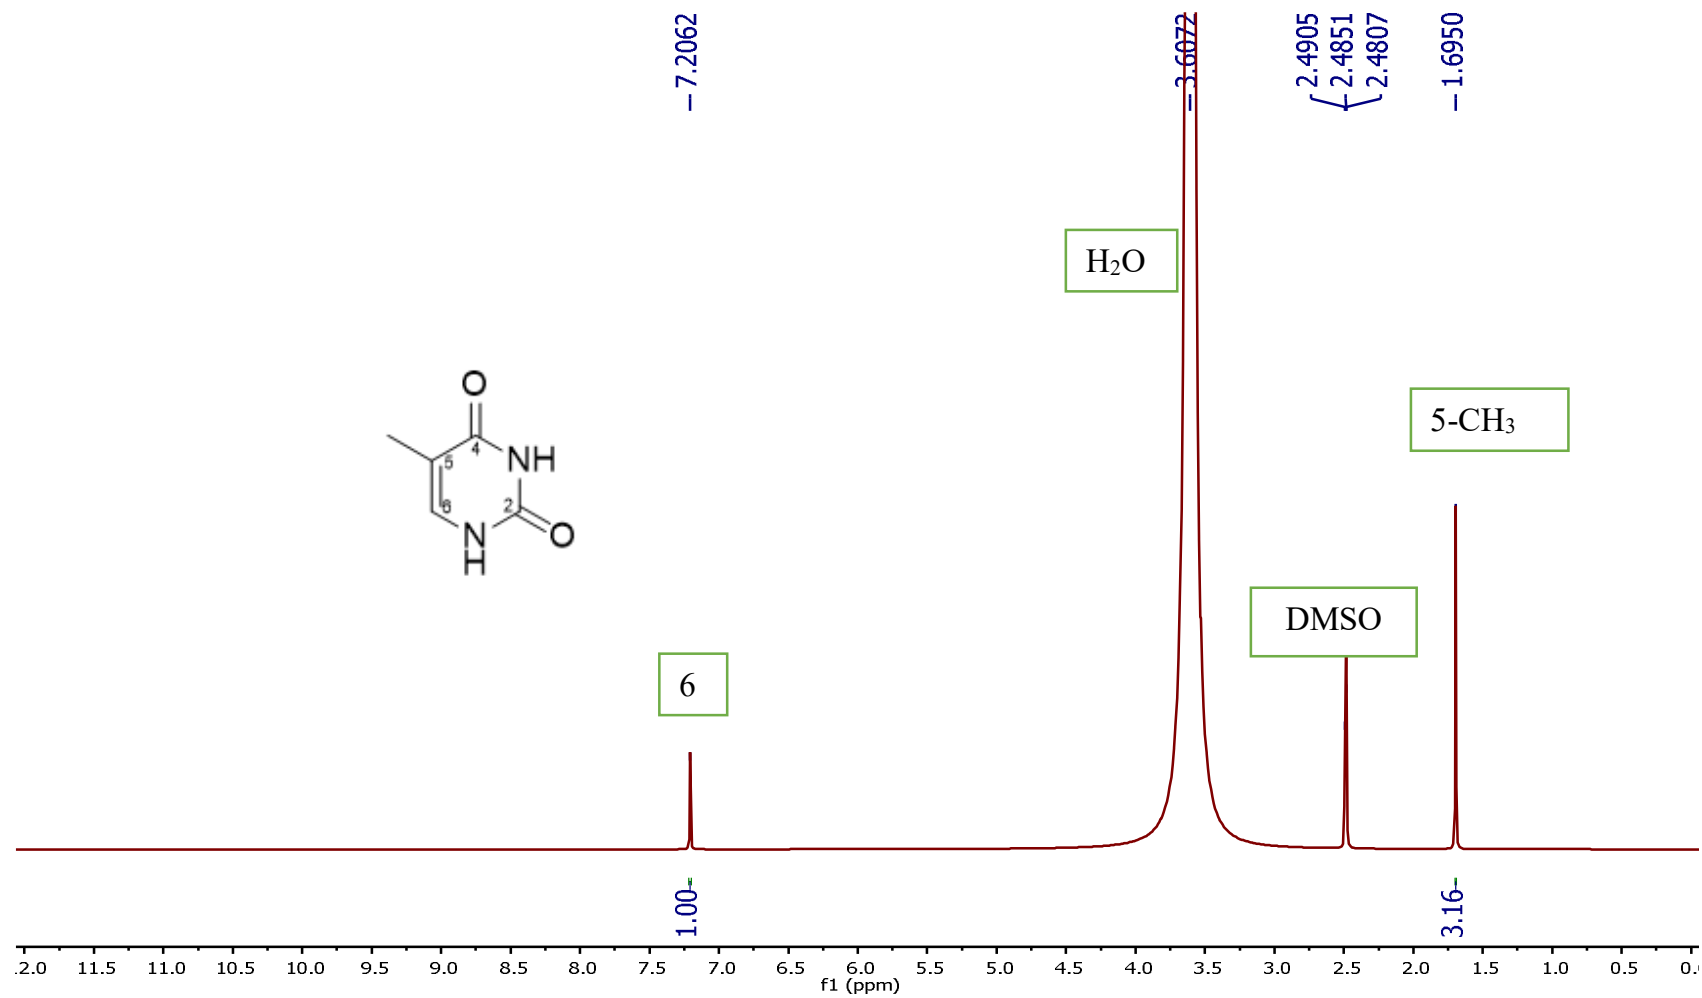

**Figure S1.**  $^1\text{H}$  NMR spectrum of compound **1** (thiamine), measured in  $\text{DMSO-d}_6$  at 500 MHz.

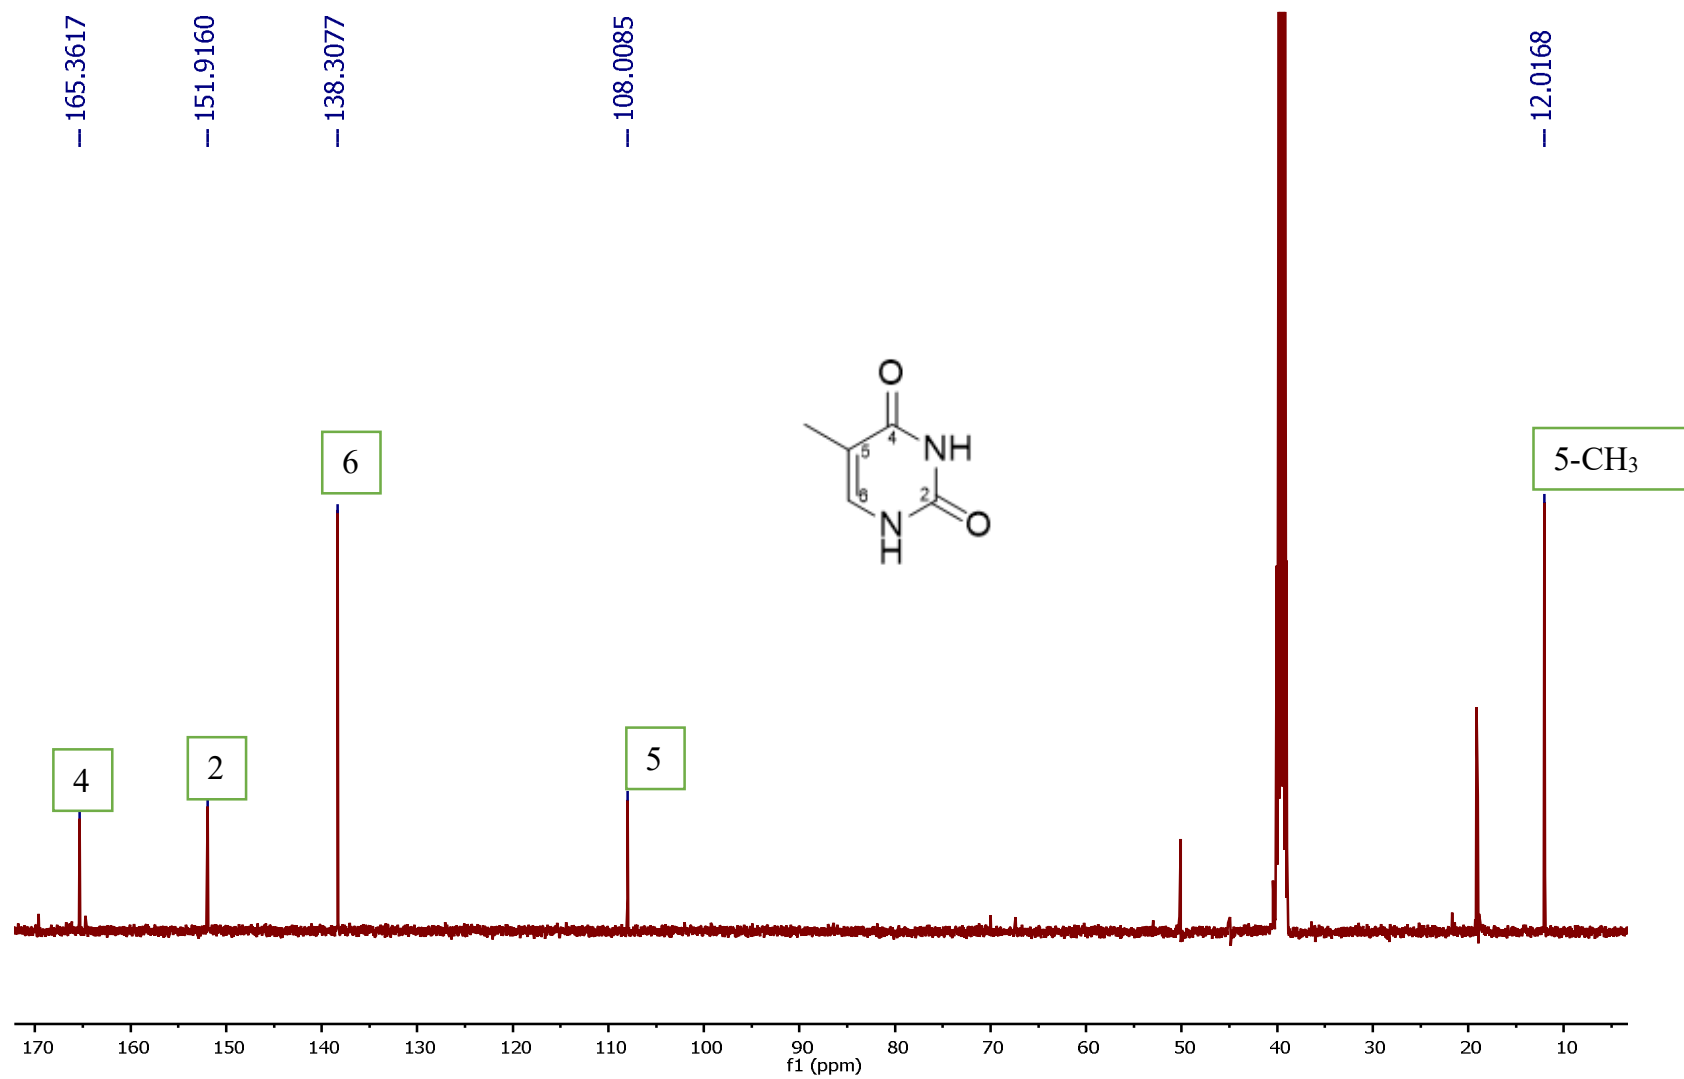

**Figure S2.**  $^{13}\text{C}$  NMR spectrum of compound 1 (thiamine), measured in DMSO- $d_6$  at 125 MHz.

|               |            |             |                      |                 |              |                        |                       |
|---------------|------------|-------------|----------------------|-----------------|--------------|------------------------|-----------------------|
| Sample Name   | VK04       | Position    | P2-A7                | Instrument Name | Instrument 1 | User Name              |                       |
| Inj Vol       | 2          | InjPosition |                      | SampleType      | Sample       | IRM Calibration Status | Success               |
| Data Filename | VK04_Neg.d | ACQ Method  | Cot ngan - MSMS_Neg. | Comment         |              | Acquired Time          | 07/08/2020 5:17:10 PM |

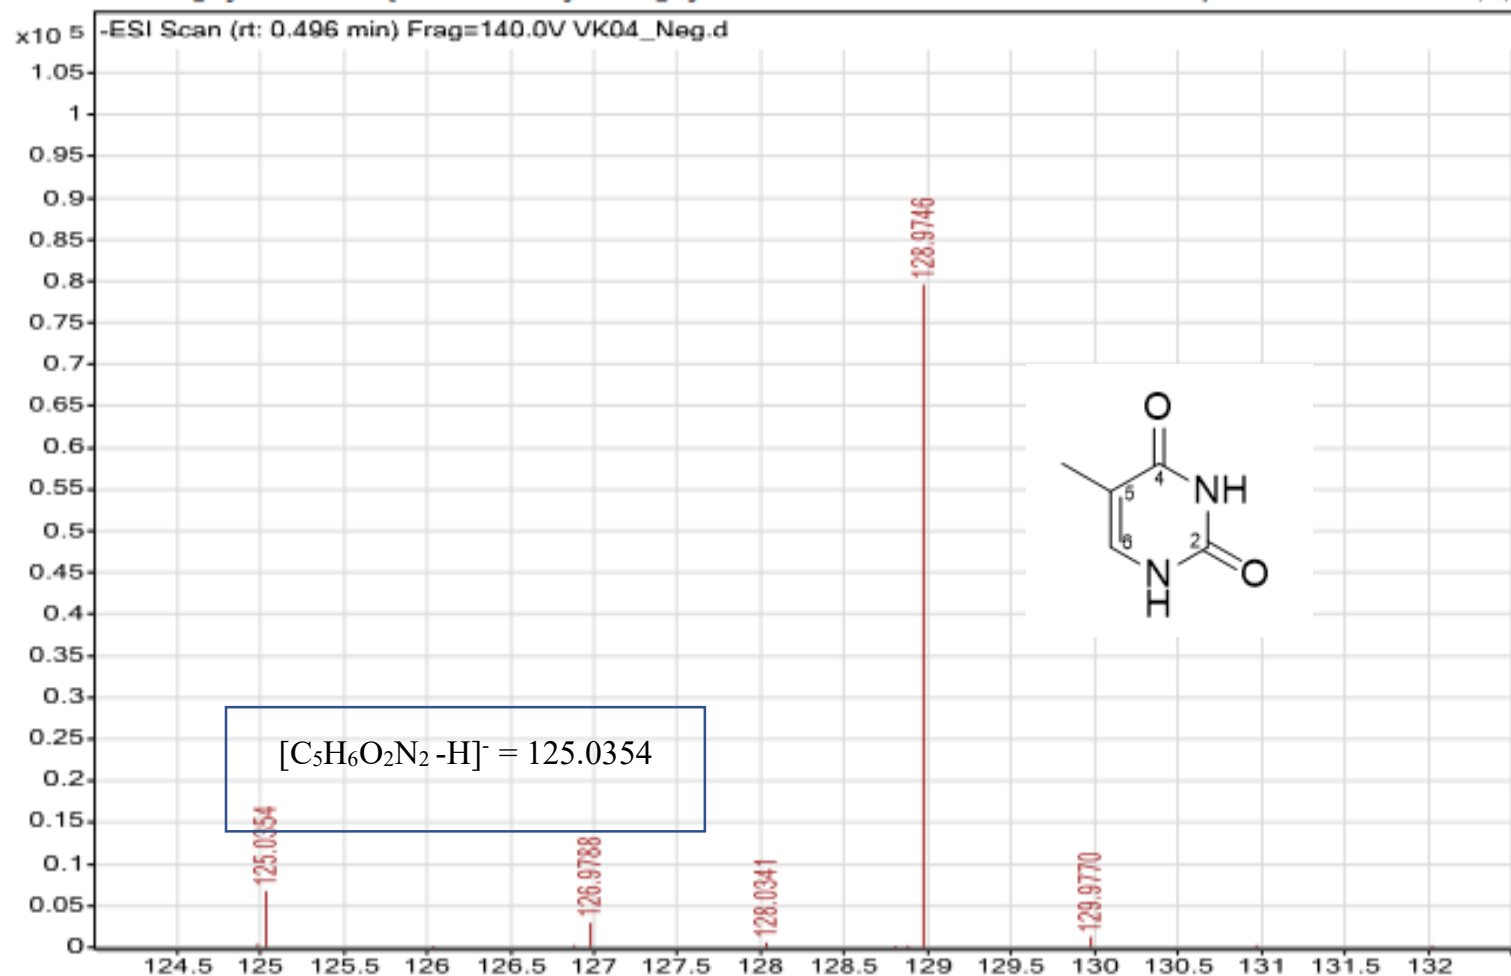

**Figure S3.** HR-ESI-MS spectrum of compound 1 (thiamine):  $[M-H]^-$  at  $m/z$  125.0354

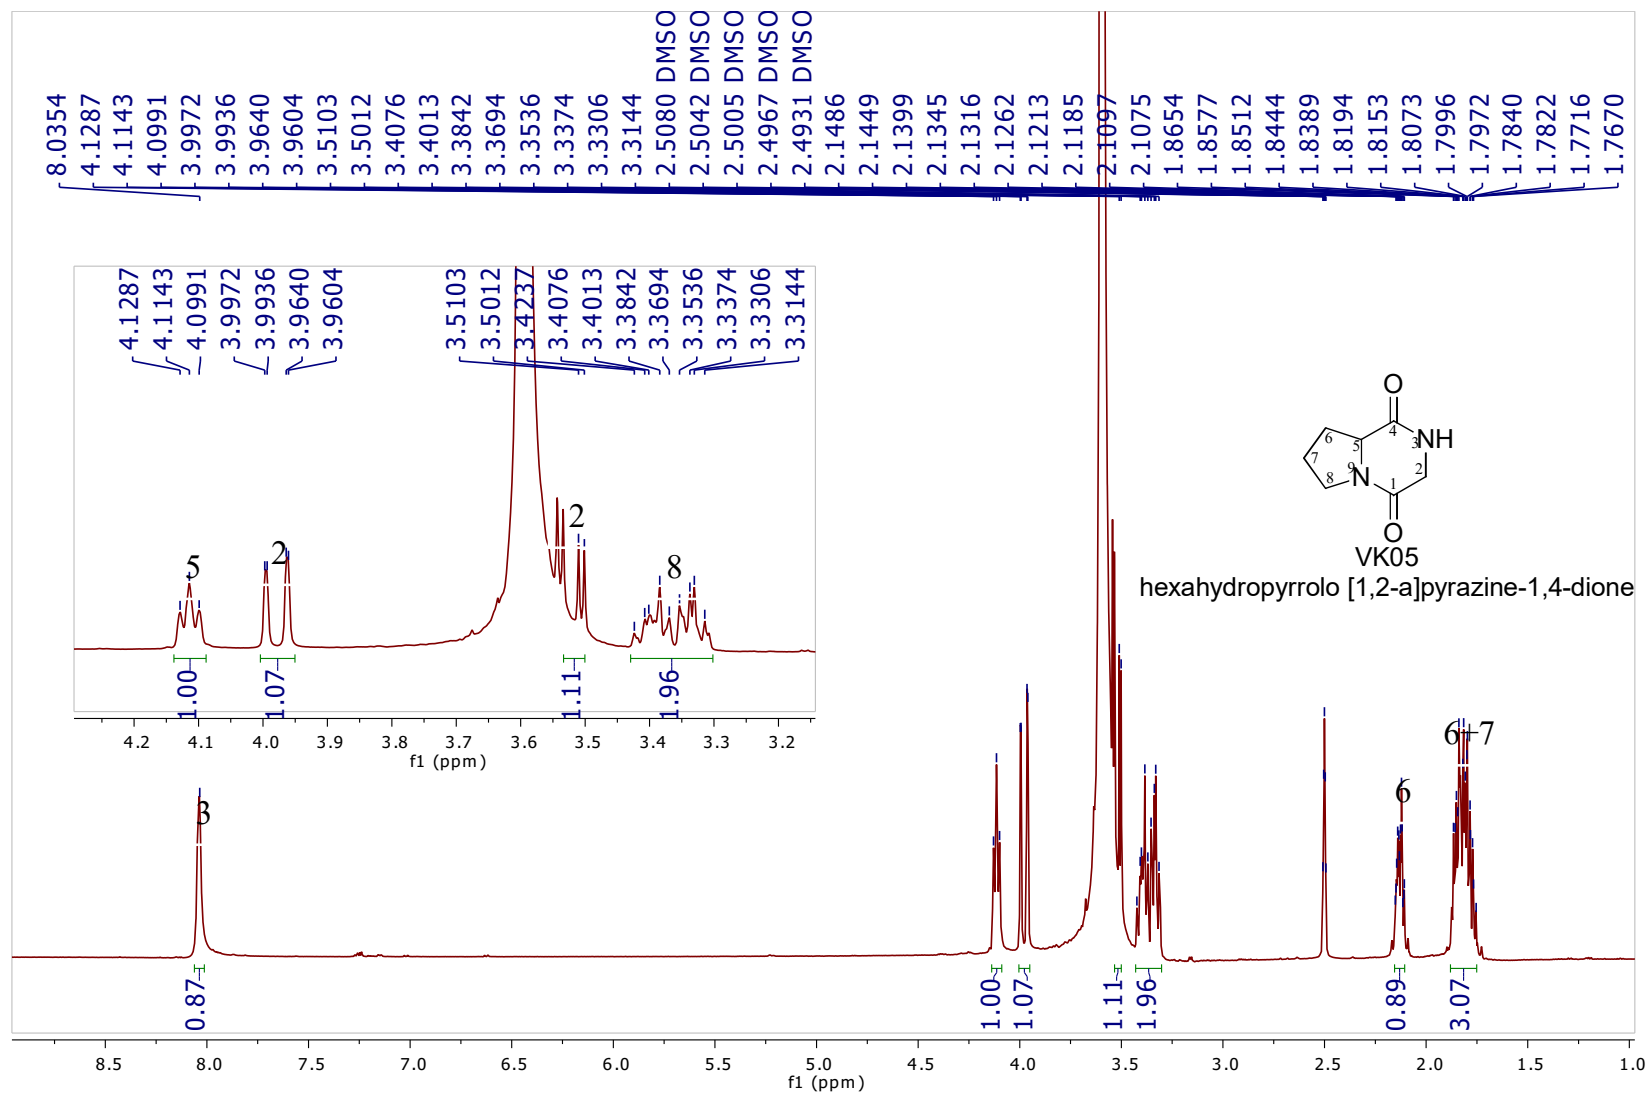

**Figure S4.**  $^1\text{H}$  NMR spectrum of compound **2** (hexahydropyrrolo [1,2-a] pyrazine-1,4-dione), measured in DMSO- $d_6$  at 500 MHz.

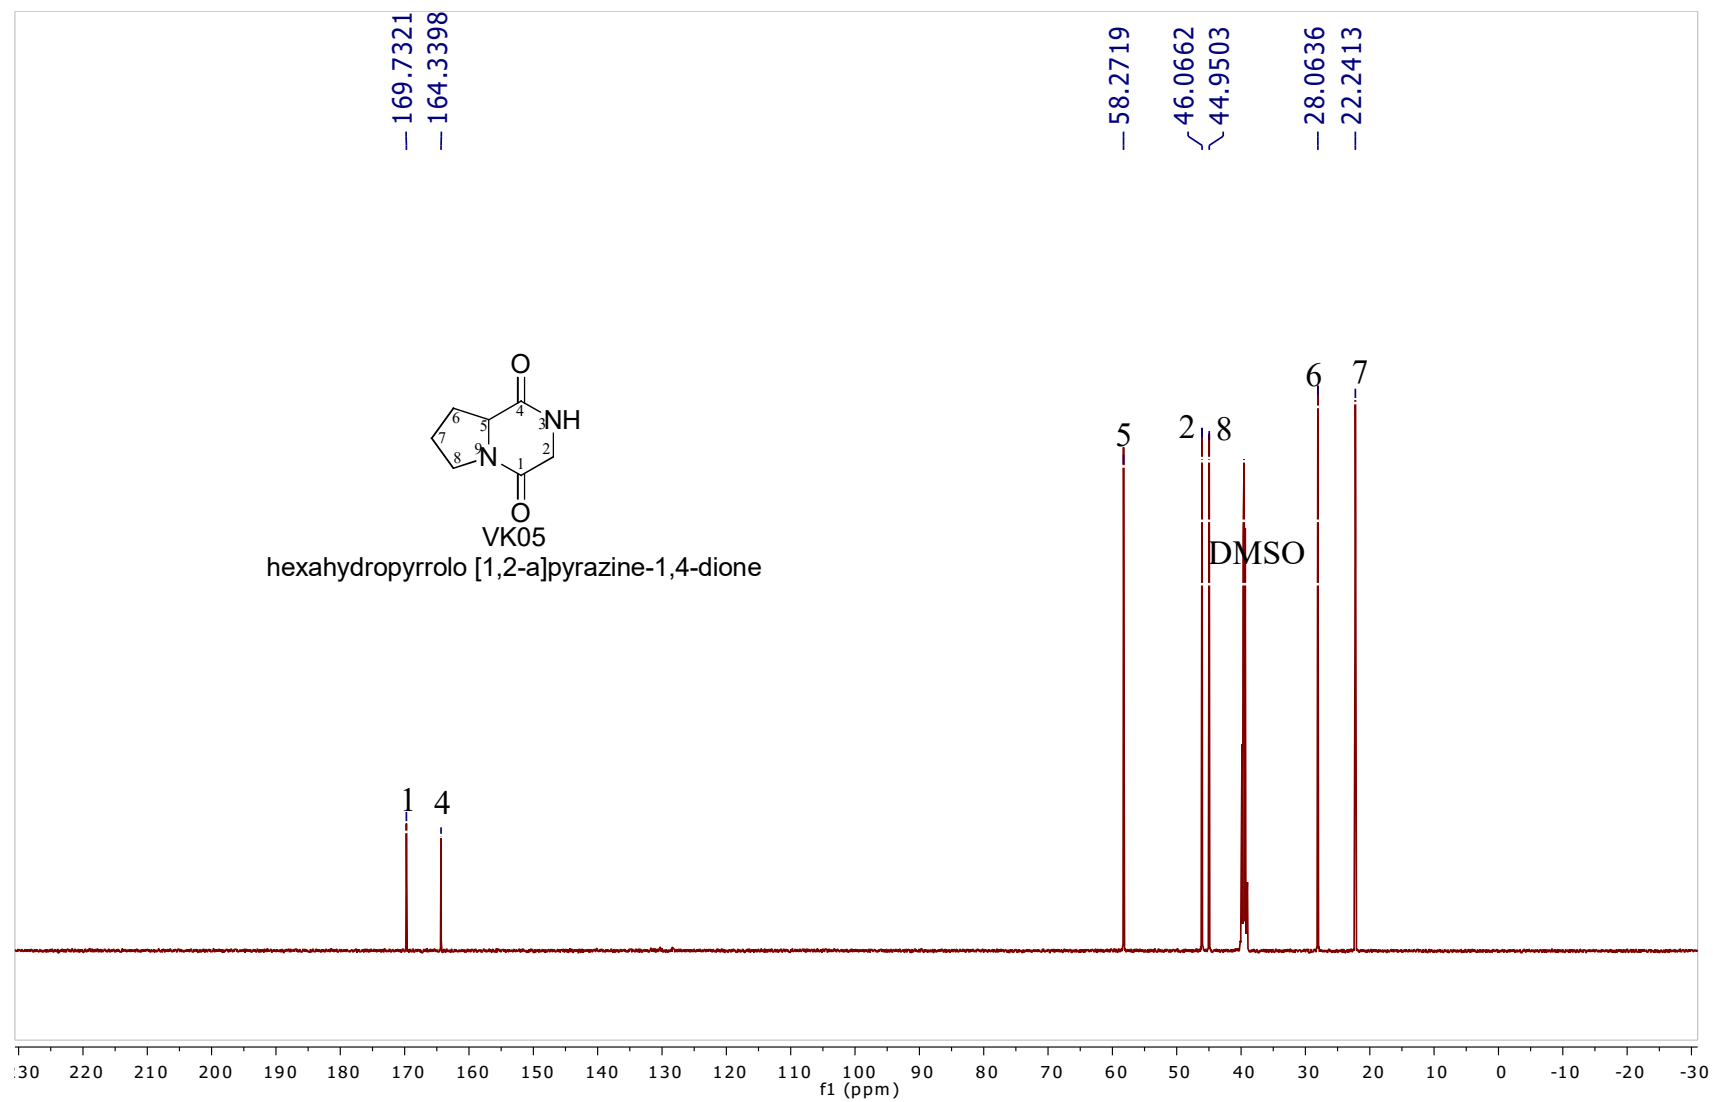

**Figure S5.** <sup>13</sup>C NMR spectrum of compound 2 (hexahydropyrrolo [1,2-a] pyrazine-1,4-dione), measured in DMSO-d<sub>6</sub> at 125 MHz.

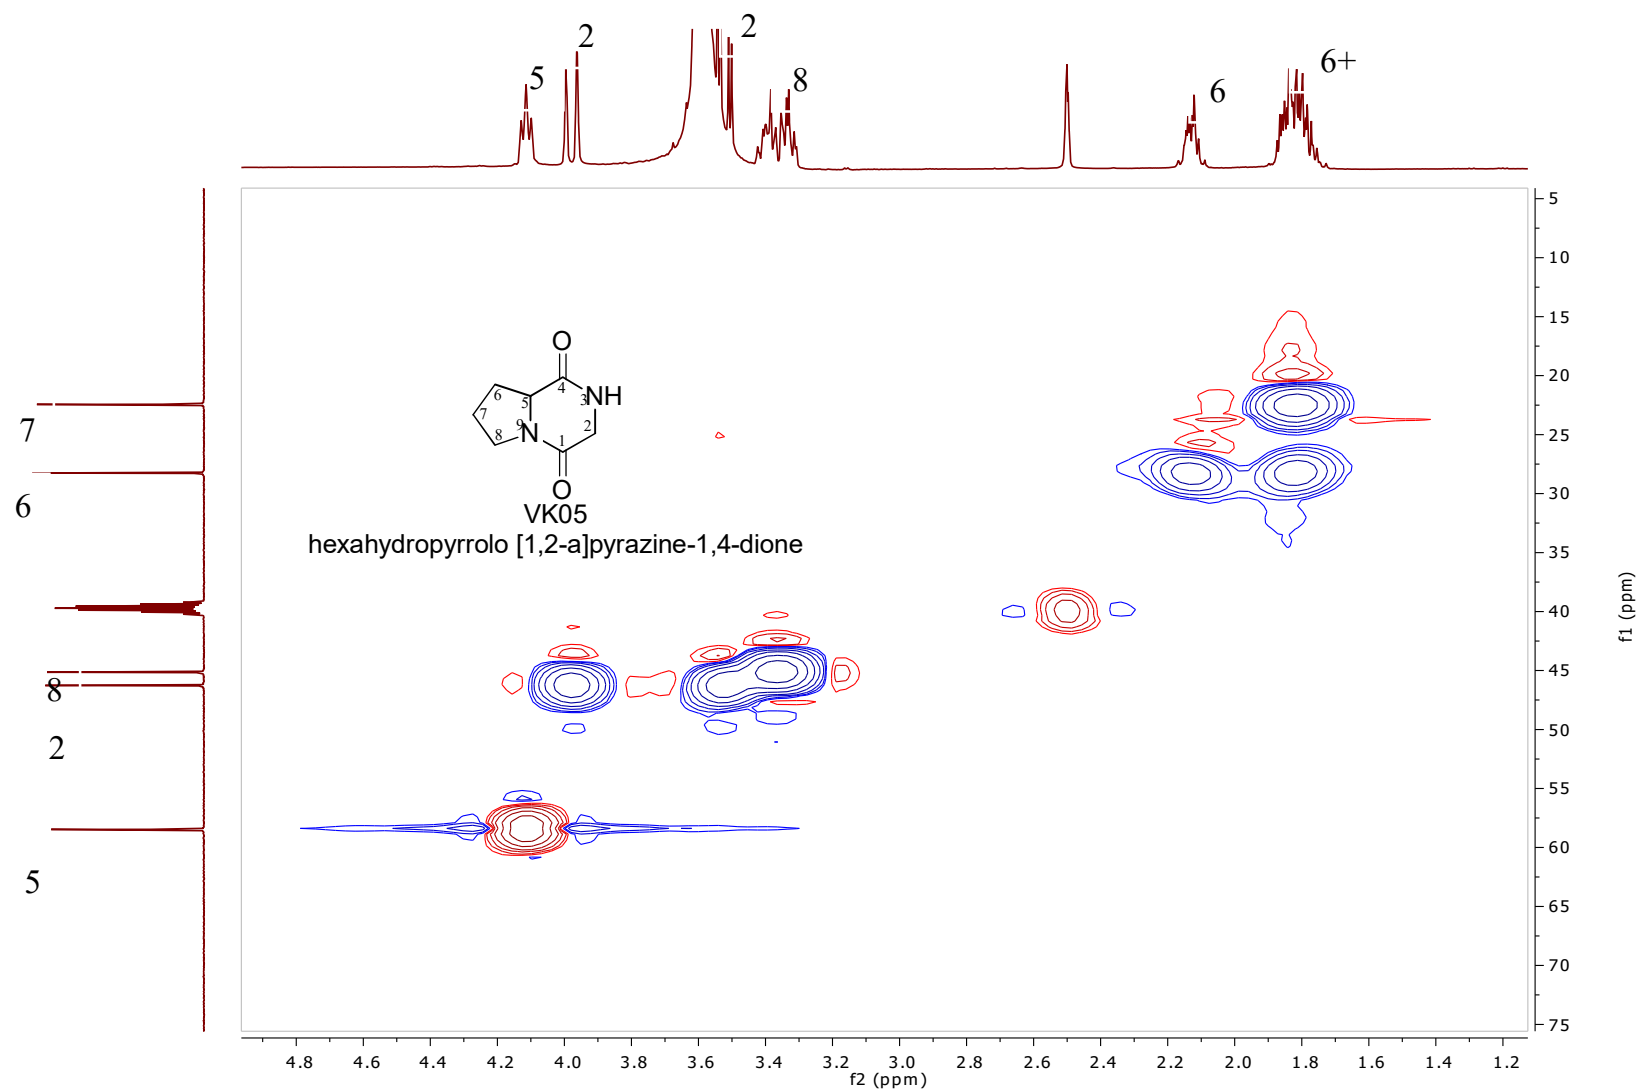

**Figure S6.** HSQC spectrum of compound 2 (hexahydropyrrolo [1,2-a] pyrazine-1,4-dione)

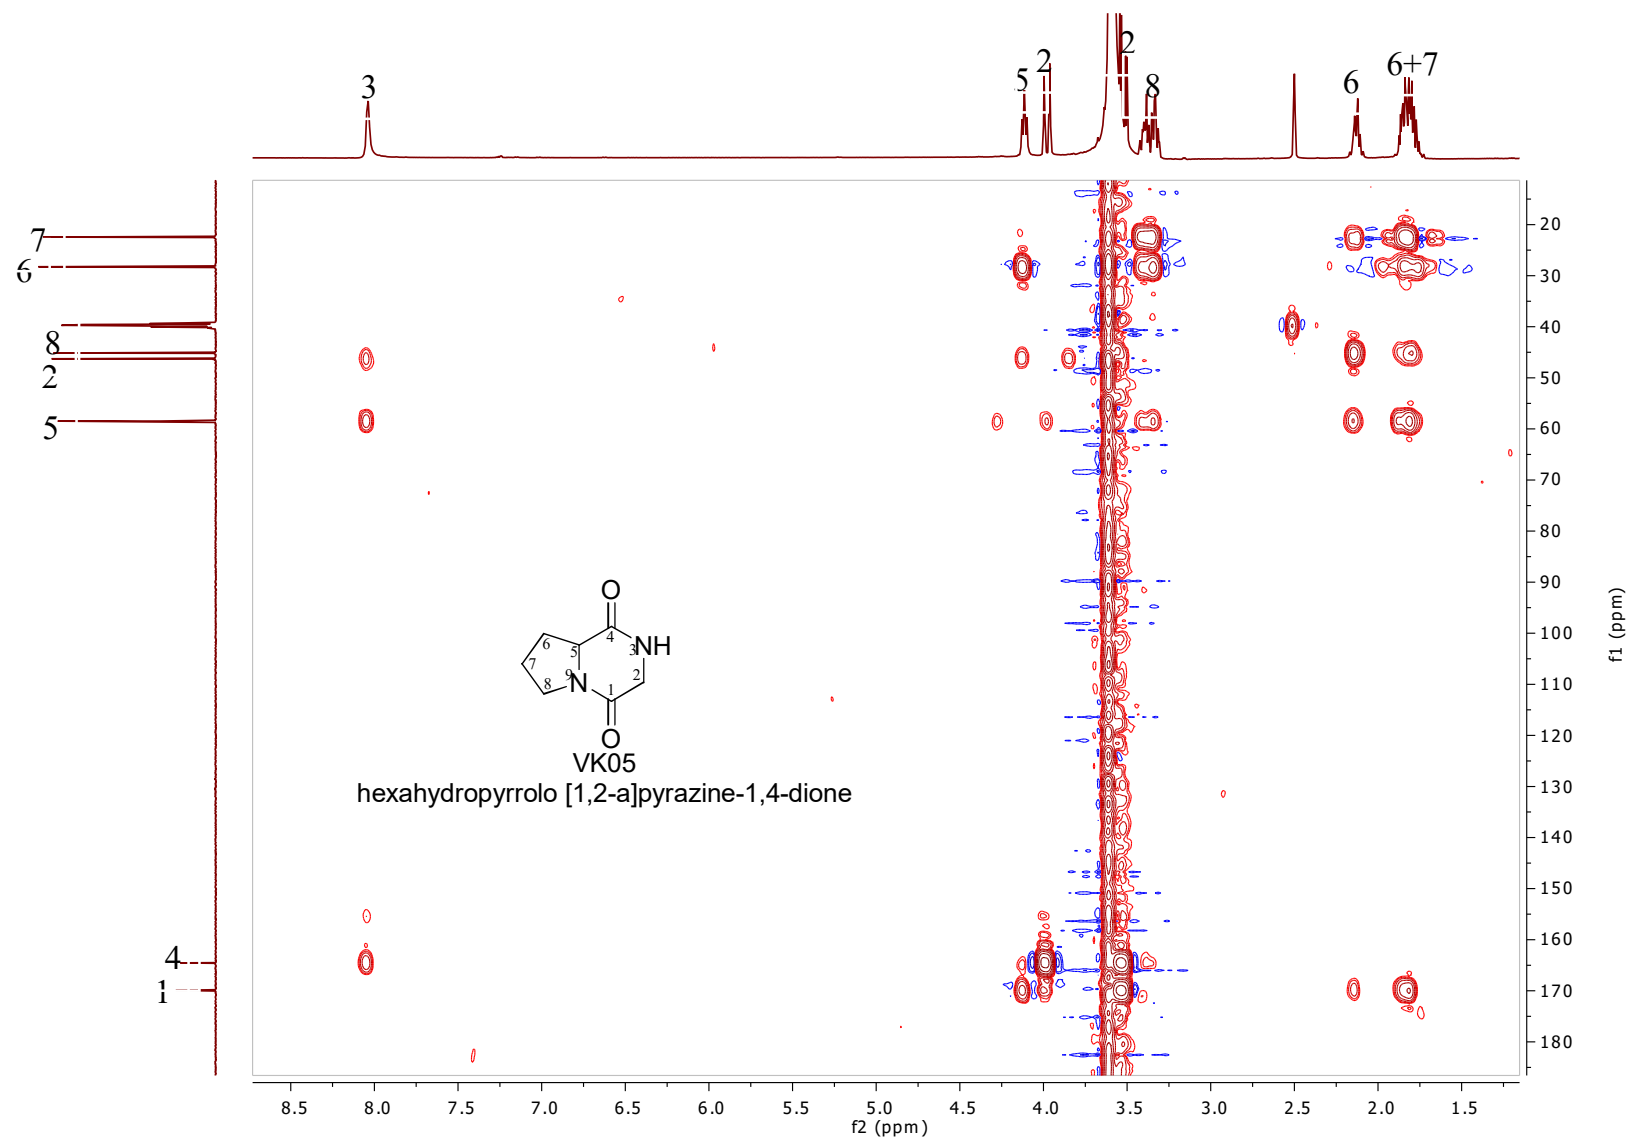

**Figure S7.** HSQC spectrum of compound 2 (hexahydropyrrolo [1,2-a] pyrazine-1,4-dione)



|               |         |             |                      |                 |              |                        |                       |
|---------------|---------|-------------|----------------------|-----------------|--------------|------------------------|-----------------------|
| Sample Name   | VK 05   | Position    | P1-D2                | Instrument Name | Instrument 1 | User Name              |                       |
| Inj Vol       | 2       | InjPosition |                      | SampleType      | Sample       | IRM Calibration Status | Success               |
| Data Filename | VK 05.d | ACQ Method  | Cot ngan - MSMS_Pos. | Comment         |              | Acquired Time          | 06/11/2020 5:22:51 PM |

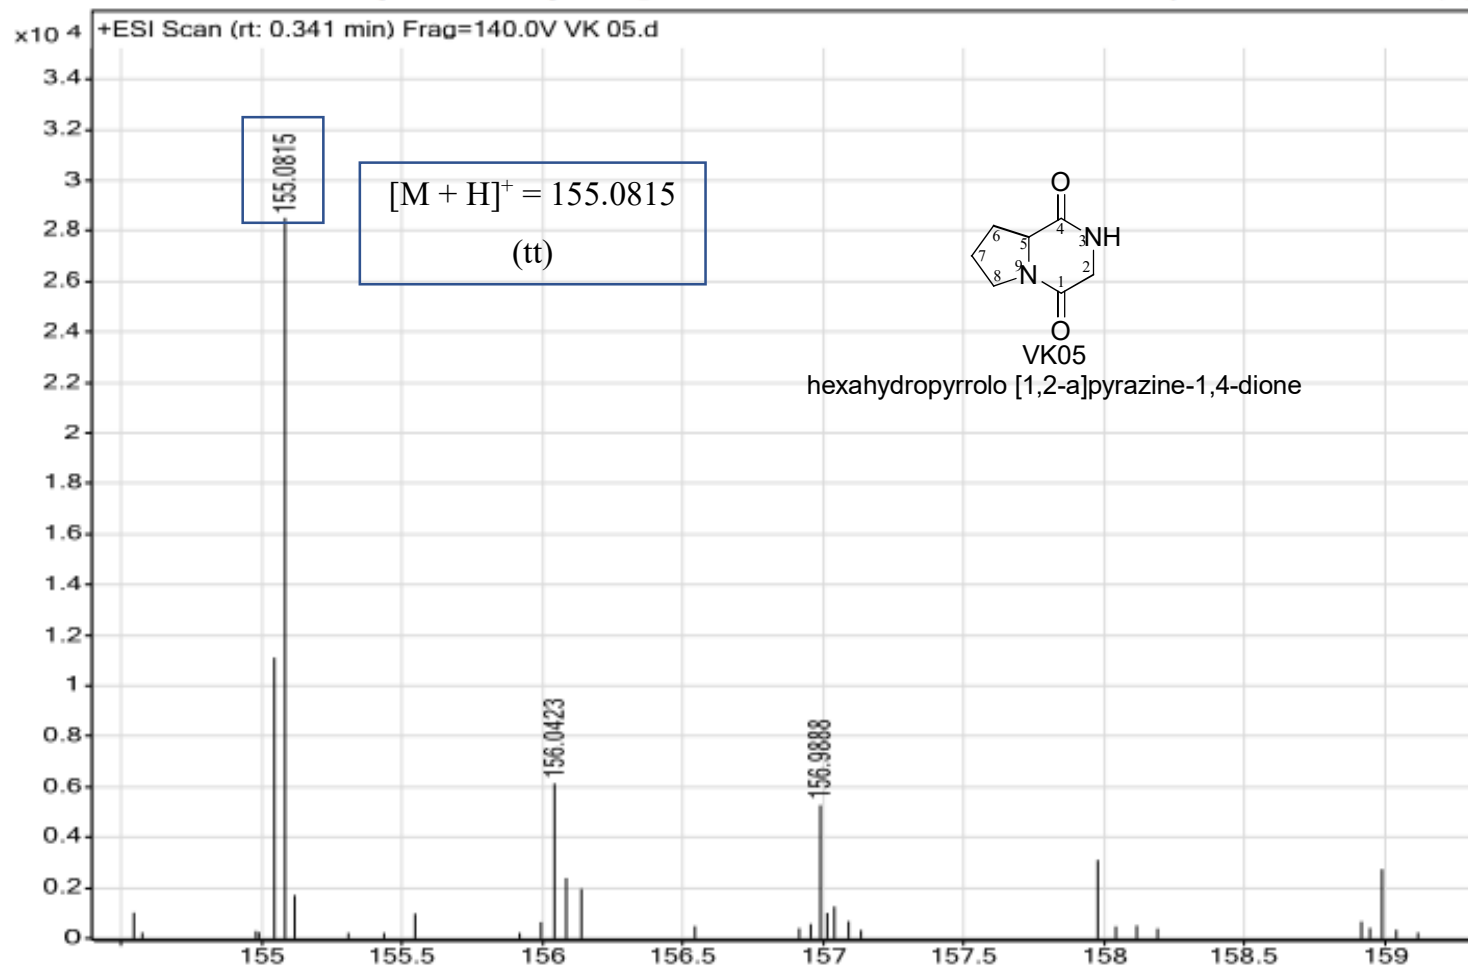

Figure S8. HR-ESI-MS spectrum of compound 2 (hexahydropyrrolo [1,2-a] pyrazine-1,4-dione)
